# Supplementary material
Source: publisher figshare collection journal article supplement (https://springernature.figshare.com/ndownloader/files/22450667)
Supplement: Supplementary file 1 [file 22450667]

Measurement(s),Internet Social Media • geographic location • flood
Technology Type(s),digital curation • computational modeling technique
Factor Type(s),text • timestamp
Sample Characteristic - Environment,flood
Sample Characteristic - Location,Earth (planet)
